# Supplementary material for: IL-17 induces reactive astrocytes and up-regulation of vascular endothelial growth factor (VEGF) through JAK/STAT signaling
Source: PubMed Central journal article supplement (PMC5345044; doi:10.1038/srep41779), 2017-03-10
Supplement: srep41779-s1.pdf [file srep41779-s1.pdf]

**IL-17 Induces reactive astrocytes and up-regulation of vascular endothelial growth factor (VEGF) through JAK/STAT signaling**

Tao You<sup>1,2^</sup>, Yihui Bi<sup>2^</sup>, Jun li<sup>3</sup>, Mingkai Zhang<sup>2</sup>, Xuezhou Chen<sup>2</sup>, Keke Zhang<sup>2</sup>, Jun Li<sup>1\*</sup>

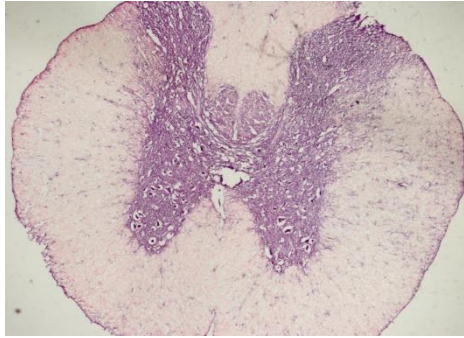

sham

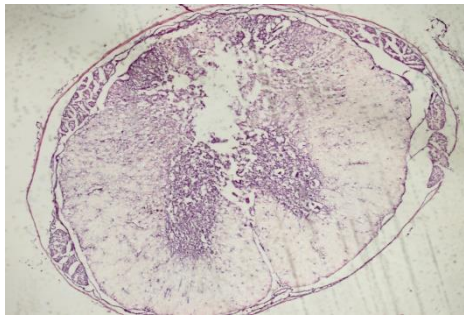

SCI

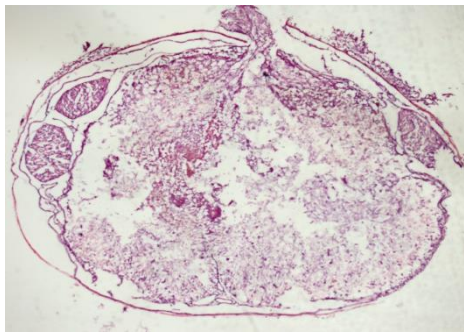

IL-17

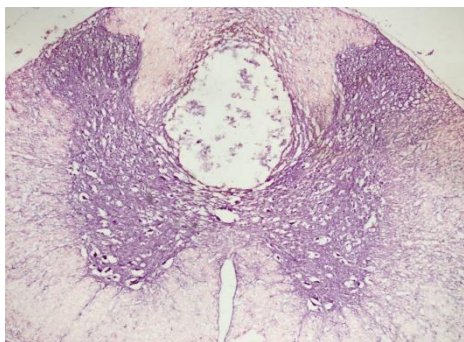

Beva

Figure legend. HE staining from various groups were used to visualize tissue changes.
